# Supplementary material for: Selective Transfection of a Transferrin Receptor-Expressing Cell Line with DNA–Lipid Nanoparticles
Source: PubMed Central journal article supplement — ACS Omega. 2024 Sep 15;9(38):39533–45. doi: 10.1021/acsomega.4c03541 (PMC11425831; doi:10.1021/acsomega.4c03541), 2024-09-15
Supplement: ao4c03541_si_001.pdf [file ao4c03541_si_001.pdf]

## SUPPORTING INFORMATION

### Selective Transfection of a Transferrin Receptor-Expressing Cell Line with DNA-Lipid Nanoparticles

Irodiel Vinales<sup>1,2,#</sup>, Juan Carlos Silva-Espinoza<sup>2,3,#</sup>, Bryan A. Medina<sup>1,2</sup>, Juan E.M. Urbay<sup>1,2</sup>, Miguel A. Beltran, Dante E. Salinas<sup>2,3</sup>, Marco A. Ramirez-Ramos<sup>1</sup>, Rosa A. Maldonado<sup>2,3</sup>, Wilson Poon<sup>4</sup>, Manuel L. Penichet<sup>5-9</sup>, Igor C. Almeida<sup>2,3\*</sup>, Katja Michael<sup>1,2\*</sup>

<sup>1</sup> Department of Chemistry and Biochemistry, University of Texas at El Paso, El Paso, TX, USA

<sup>2</sup> Border Biomedical Research Center, University of Texas at El Paso, El Paso, TX, USA

<sup>3</sup> Department of Biological Sciences, University of Texas at El Paso, El Paso, TX, USA

<sup>4</sup> Department of Metallurgical, Materials and Biomedical Engineering, University of Texas at El Paso, El Paso, TX, USA

<sup>5</sup> Division of Surgical Oncology, Department of Surgery, David Geffen School of Medicine, University of California, Los Angeles (UCLA), Los Angeles, CA, USA

<sup>6</sup> Department of Microbiology, Immunology and Molecular Genetics, David Geffen School of Medicine, University of California, Los Angeles (UCLA), Los Angeles, CA, USA

<sup>7</sup> California Nanosystems Institute, University of California, Los Angeles, CA, USA

<sup>8</sup> The Molecular Biology Institute, University of California, Los Angeles, CA, USA

<sup>9</sup> Jonsson Comprehensive Cancer Center, University of California, Los Angeles, CA, USA

# These authors have contributed equally.

\* Corresponding Authors

## Table of Contents

|                                                                                                                                                                                                                                        |    |
|----------------------------------------------------------------------------------------------------------------------------------------------------------------------------------------------------------------------------------------|----|
| <b>Figure S1.</b> Percentage of mGL-positive CHO-TRVb-hTfR1 cells using two different LNP-DT7 formulations, one with 2.5% DMG-PEG2000 and the other with 3% DMG-PEG2000. ....                                                          | S3 |
| <b>Table S1.</b> Characterization of LNP-Mal and LNP-DT7 .....                                                                                                                                                                         | S4 |
| <b>Figure S2.</b> Flow cytometry gating strategy to determine the percentage of mGL-positive cells in the <i>in vitro</i> transfection experiments. ....                                                                               | S4 |
| <b>Figure S3.</b> Representative flow cytometry data for the transfection experiments using a 1:1 mixture of CHO-TRVb-neo and CHO-TRVb-hTfR1 cells at a pDNA concentration of 300, 600, and 1000 ng/well encapsulated in LNP-DT7 ..... | S5 |
| <b>Figure S4.</b> Percentage of mGL-positive CHO-TRVb-hTfR1 cells at different concentrations of pDNA encapsulated in LNP-DT7. ....                                                                                                    | S6 |
| <b>Figure S5.</b> Percentage of mGL-positive CHO-TRVb-neo cells at different concentrations of pDNA encapsulated in LNP-2ME and LNP-DT7. ....                                                                                          | S7 |
| <b>Figure S6.</b> Percentage of mGL-positive CHO-TRVb-hTfR1 cells at different concentrations of pDNA encapsulated in LNP-2ME and LNP-DT7. ....                                                                                        | S8 |

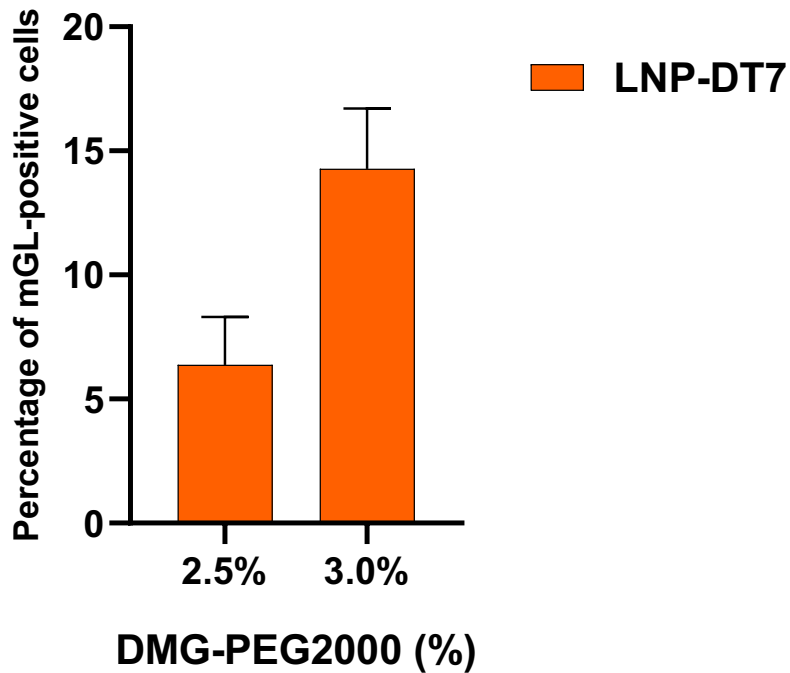

**Figure S1.** Percentage of mGL-positive CHO-TRVb-hTfR1 cells using two different LNP-DT7 formulations, one with 2.5% DMG-PEG2000 and the other with 3% DMG-PEG2000. CHO-TRVb-hTfR1 cells were transfected with 600 ng of mGL-pDNA encapsulated in LNP-DT7. The percentage of mGL transfected cells was evaluated by flow cytometry. Data were represented as mean  $\pm$  SD of biological replicates ( $n = 3$ ).

**Table S1.** Characterization of LNP-Mal and LNP-DT7 at different DMG-PEG2000 percentages (top section) and different N/P ratios (bottom section) showing size (intensity-weighted), PDI,  $\zeta$ -potential, EE%, and yield.

| Different DMG-PEG2000 percentages              |         |           |       |       |       |       |       |                         |      |       |        |     |     |           |     |     |
|------------------------------------------------|---------|-----------|-------|-------|-------|-------|-------|-------------------------|------|-------|--------|-----|-----|-----------|-----|-----|
| DMG-PEG2000 %                                  | LNP     | Size (nm) |       |       | PDI   |       |       | $\zeta$ -Potential (mV) |      |       | EE (%) |     |     | Yield (%) |     |     |
|                                                |         | I         | II    | III   | I     | II    | III   | I                       | II   | III   | I      | II  | III | I         | II  | III |
| 1                                              | LNP-Mal | 123.2     | 112.6 | 117.2 | 0.091 | 0.071 | 0.072 | 7.6                     | 5.0  | 6.4   | 90     | 92  | 88  | 81        | 83  | 65  |
| 2                                              | LNP-Mal | 125.5     | 98.6  | 100.4 | 0.097 | 0.097 | 0.078 | 5.9                     | 5.9  | 5.6   | 79     | 91  | 87  | 97        | 97  | 78  |
| 2.5                                            | LNP-Mal | 121.9     | 96.5  | 94.2  | 0.118 | 0.141 | 0.120 | 8.9                     | 8.4  | 10.3  | 73     | 84  | 91  | 88        | 99  | 99  |
| 3                                              | LNP-Mal | 98.9      | 92.6  | 91.3  | 0.105 | 0.119 | 0.096 | 5.7                     | 7.6  | 4.2   | 85     | 87  | 87  | 93        | 91  | 99  |
| 5                                              | LNP-Mal | 88.4      | 82.1  | 83.5  | 0.084 | 0.085 | 0.100 | 0.0                     | 2.3  | 1.5   | 28     | 57  | 66  | 77        | 90  | 97  |
| Different N/P ratios keeping DMG-PEG2000 at 3% |         |           |       |       |       |       |       |                         |      |       |        |     |     |           |     |     |
| N/P ratio                                      | LNP     | Size (nm) |       |       | PDI   |       |       | $\zeta$ -Potential (mV) |      |       | EE (%) |     |     | Yield (%) |     |     |
|                                                |         | I         | II    | III   | I     | II    | III   | I                       | II   | III   | I      | II  | III | I         | II  | III |
| 4                                              | LNP-Mal | 106.2     | 103.3 | 98.3  | 0.105 | 0.096 | 0.076 | 4.1                     | 2.2  | 5.6   | 45     | 73  | 71  | 93        | 96  | 90  |
| 6                                              | LNP-Mal | 98.9      | 92.6  | 91.3  | 0.105 | 0.119 | 0.096 | 5.7                     | 7.6  | 4.2   | 85     | 87  | 87  | 93        | 91  | 99  |
| 8                                              | LNP-Mal | 105.1     | 88.1  | 84.8  | 0.138 | 0.125 | 0.121 | 3.1                     | 3.1  | 3.1   | 69     | 88  | 86  | 74        | 97  | 98  |
| 10                                             | LNP-Mal | 98.8      | 82.1  | 85.6  | 0.140 | 0.112 | 0.142 | 7.1                     | 5.5  | 4.6   | 73     | 87  | 88  | 69        | 92  | 97  |
| 4                                              | LNP-DT7 | agg       | agg   | agg   | agg   | agg   | agg   | agg                     | agg  | agg   | agg    | agg | agg | agg       | agg | agg |
| 2                                              | LNP-DT7 | 176.7     | 158.8 | 154.7 | 0.097 | 0.162 | 0.180 | -6.8                    | -6.7 | -6.8  | 61     | 86  | 93  | 82        | 74  | 75  |
| 2.5                                            | LNP-DT7 | 177.0     | 161.3 | 172.5 | 0.115 | 0.150 | 0.187 | -9.5                    | -8.3 | -8.1  | 66     | 72  | 78  | 83        | 80  | 84  |
| 3                                              | LNP-DT7 | 158.2     | 149.0 | 148.2 | 0.099 | 0.176 | 0.161 | -6.0                    | -3.1 | -6.6  | 80     | 79  | 81  | 83        | 88  | 96  |
| 5                                              | LNP-DT7 | 136.6     | 145.8 | 149.6 | 0.070 | 0.051 | 0.039 | -8.5                    | -7.4 | -8.8  | 28     | 46  | 50  | 79        | 81  | 91  |
| 4                                              | LNP-DT7 | 210.2     | 218.3 | 199.0 | 0.302 | 0.182 | 0.174 | -7.2                    | -9.1 | -10.3 | 41     | 61  | 63  | 88        | 79  | 80  |
| 6                                              | LNP-DT7 | 158.2     | 149.0 | 148.2 | 0.099 | 0.176 | 0.161 | -6.0                    | -3.1 | -6.6  | 80     | 79  | 81  | 83        | 88  | 96  |
| 8                                              | LNP-DT7 | 172.6     | 133.5 | 144.7 | 0.091 | 0.215 | 0.200 | -5.2                    | -8.3 | -9.1  | 64     | 79  | 79  | 67        | 76  | 80  |
| 10                                             | LNP-DT7 | 150.8     | 110.9 | 113.9 | 0.152 | 0.288 | 0.235 | -5.8                    | -4.3 | -4.0  | 68     | 86  | 82  | 59        | 83  | 99  |

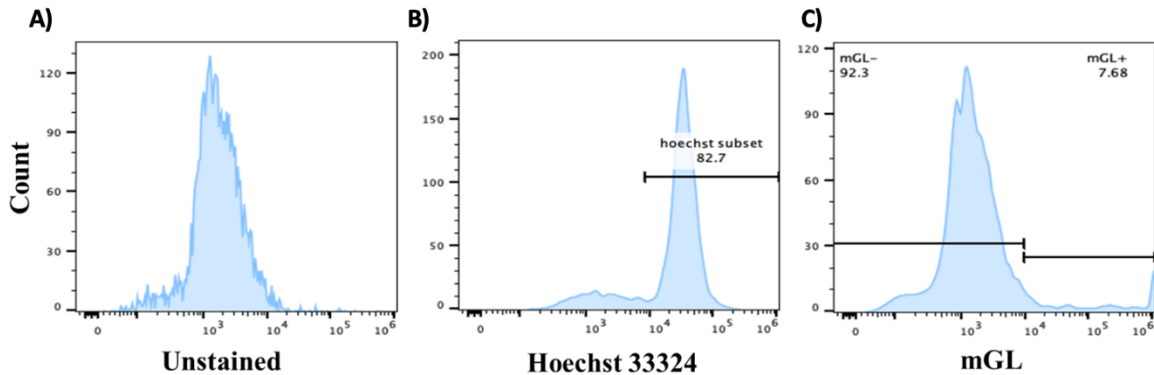

**Figure S2.** Flow cytometry gating strategy to determine the percentage of mGL-positive cells in the *in vitro* transfection experiments. A) Histogram of unstained CHO-TRVb (-neo or -hTfR1) cells. B) The Hoechst-positive population was identified (FL9: filter 450/40), and the gating strategy was established by counting 2000 events. C) mGL-positive cells (FL1: 525/40) were pre-gated with Hoechst 33324.

LNP-DT7

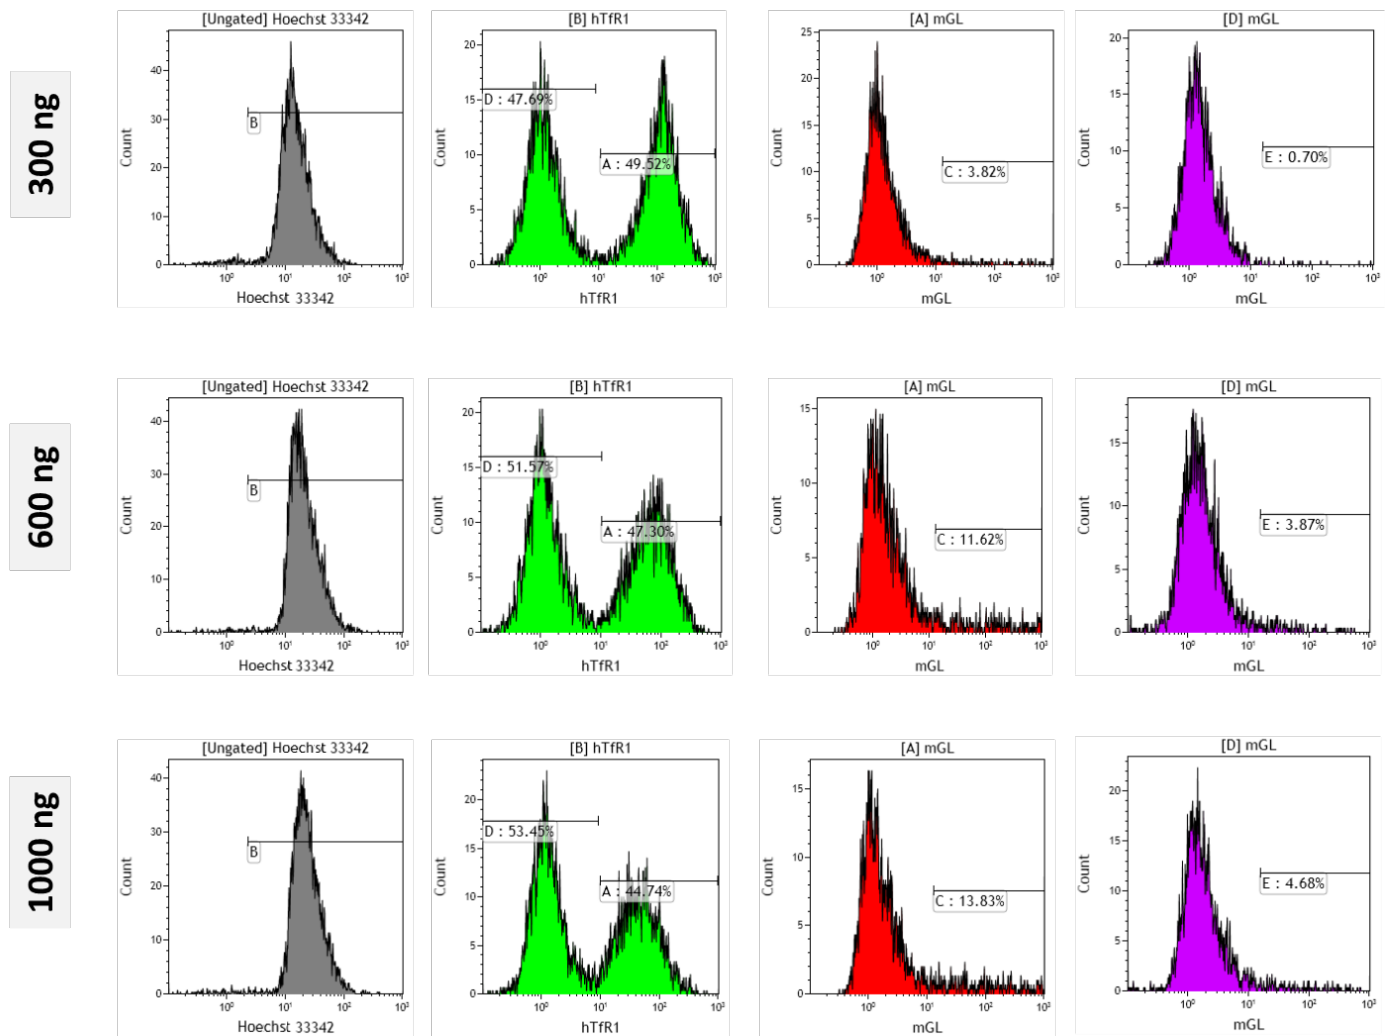

**Figure S3.** Representative flow cytometry data for the transfection experiments using a 1:1 mixture of CHO-TRVb-neo and CHO-TRVb-hTfR1 cells at a pDNA concentration of 300, 600, and 1000 ng/well encapsulated in LNP-DT7. A total of 5000 events were acquired in Gallios Beckman Coulter. The cells were first gated in Hoechst 33342 positive cells, a second gate on the expression of the hTfR1 receptor detected by the fluorescent mouse anti-hTfR1 (CD71) monoclonal antibody (OKT9 (OKT-9)), PerCP-eFluor™ 710, eBiosciences™, and followed by a third gate on the expression of the mGL.

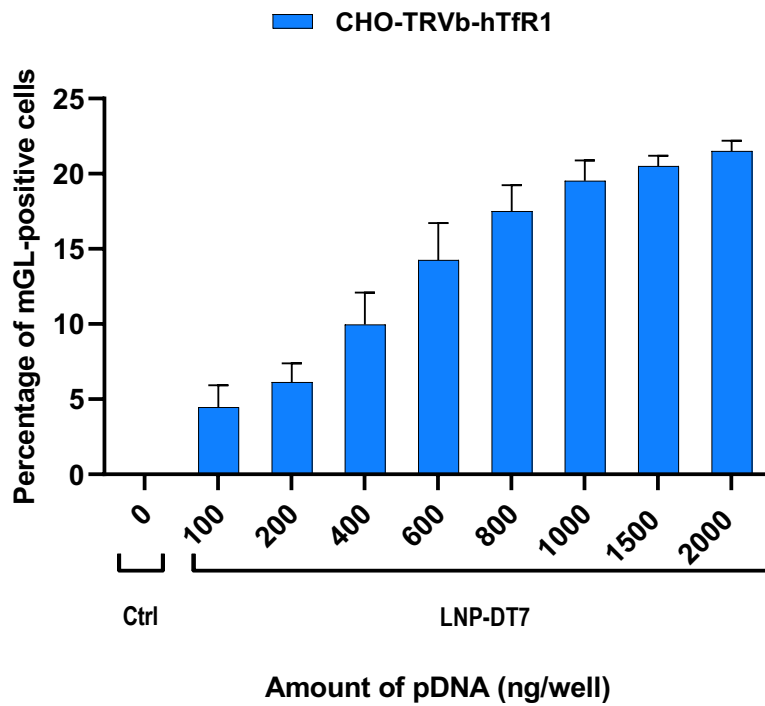

**Figure S4.** Percentage of mGL-positive CHO-TRVb-hTfR1 cells at different concentrations of pDNA encapsulated in LNP-DT7. CHO-TRVb-hTfR1 cells transfected with 0, 100, 200, 400, 600, 800, 1000, 1500, and 2000 ng of mGL-pDNA encapsulated in LNP-DT7. The percentage of mGL transfected cells was evaluated by flow cytometry. Data were represented as mean  $\pm$  SD of biological replicates (n = 3 for 0, 100, 200, 400, 600, 800, 1000; and n = 2 for 1500 and 2000).

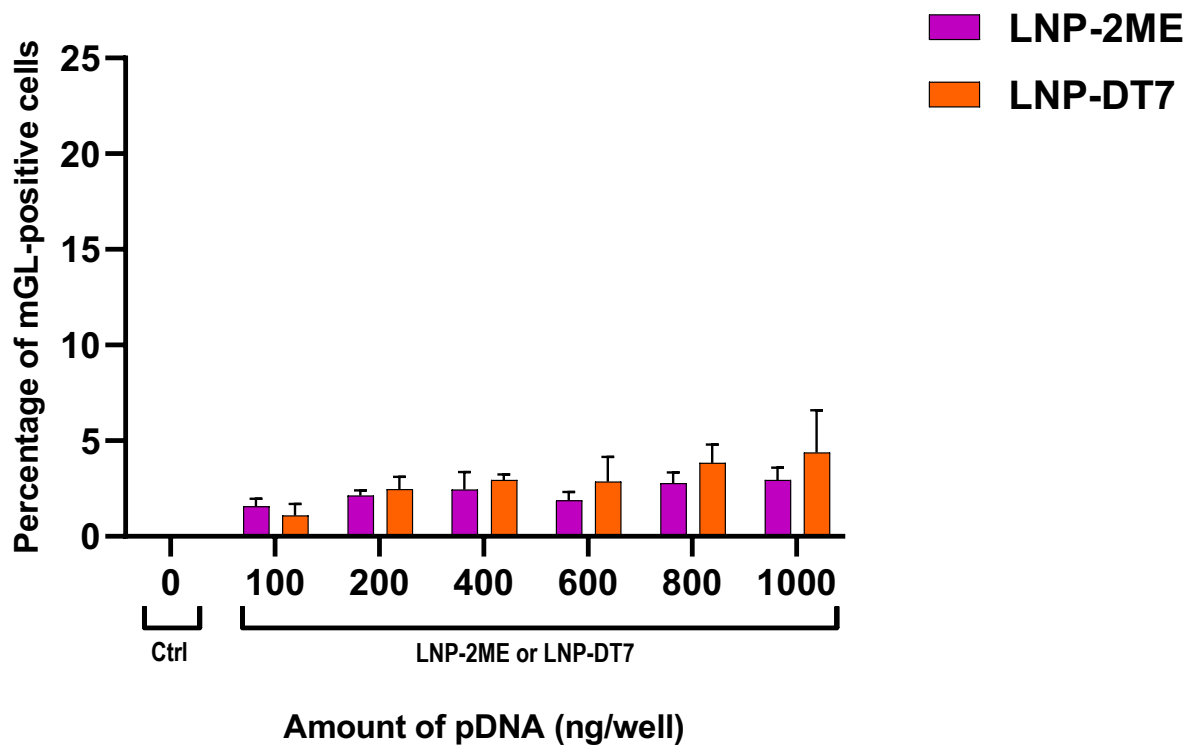

**Figure S5.** Percentage of mGL-positive CHO-TRVb-neo cells at different concentrations of pDNA encapsulated in LNP-2ME and LNP-DT7. CHO-TRVb-neo cells were transfected with 0, 100, 200, 400, 600, 800, and 1000 ng of mGL-pDNA encapsulated in LNP-2ME (non-targeting LNPs) and LNP-DT7 (active targeting LNPs). The percentage of mGL transfected cells was evaluated by flow cytometry by counting 10,000 events.

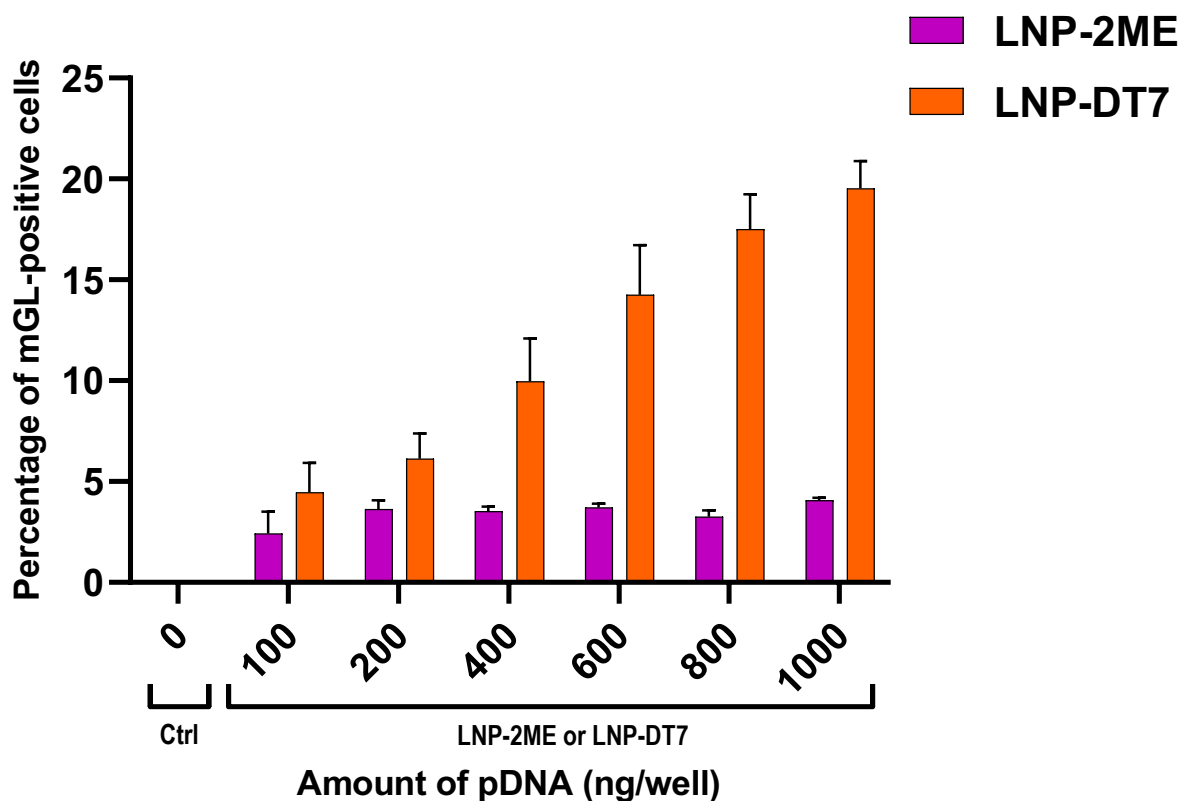

**Figure S6.** Percentage of mGL-positive CHO-TRVb-hTfR1 cells at different concentrations of pDNA encapsulated in LNP-2ME and LNP-DT7. CHO-TRVb-hTfR1 cells were transfected with 0, 100, 200, 400, 600, 800, and 1000 ng of mGL-pDNA encapsulated in LNP-2ME (non-targeting LNPs) and LNP-DT7 (active targeting LNPs). The percentage of mGL transfected cells was evaluated by flow cytometry by counting 10,000 events.
